# Supplementary material for: Pr2Ni0.8Co0.2O4+δ impregnated La0.6Sr0.4CoO3−δ oxygen electrode for efficient CO2 electroreduction in solid oxide electrolysis cells
Source: Royal Society of Chemistry journal article supplement (doi:10.1039/d4ra01848f), 2024-01-01
Supplement: d4ra01848f1.pdf [file d4ra01848f1.pdf]

## Supporting Information

### **Pr<sub>2</sub>Ni<sub>0.8</sub>Co<sub>0.2</sub>O<sub>4+δ</sub> impregnated La<sub>0.6</sub>Sr<sub>0.4</sub>CoO<sub>3-δ</sub> oxygen electrode for efficient CO<sub>2</sub> electroreduction in solid oxide electrolysis cells**

**Binbin Liu,<sup>a</sup> Zeming Li,<sup>cd</sup> Guoping Xiao,<sup>cd</sup> Xian-Long Du,<sup>\*cd</sup> Huichao Yao,<sup>b</sup>  
Ruoyun Dai,<sup>b</sup> Xiulin Wang,<sup>\*b</sup> Jian-Qiang Wang<sup>cd</sup> and Tao Li<sup>\*a</sup>**

<sup>a</sup> Engineering Research Center of Large-Scale Reactor Engineering and Technology, Ministry of Education, State Key Laboratory of Chemical Engineering, East China University of Science and Technology, Shanghai 200237, China

<sup>b</sup> CNOOC Gas and Power Group Co., Ltd, Beijing, 100020, China

<sup>c</sup> Key Laboratory of Interfacial Physics and Technology, Shanghai Institute of Applied Physics, Chinese Academy of Sciences, Shanghai 201800, China. E-mail: [duxianlong@sinap.ac.cn](mailto:duxianlong@sinap.ac.cn)

<sup>d</sup> University of Chinese Academy of Sciences, Beijing 100049, China

\* Corresponding Author

E-mail: [duxianlong@sinap.ac.cn](mailto:duxianlong@sinap.ac.cn)

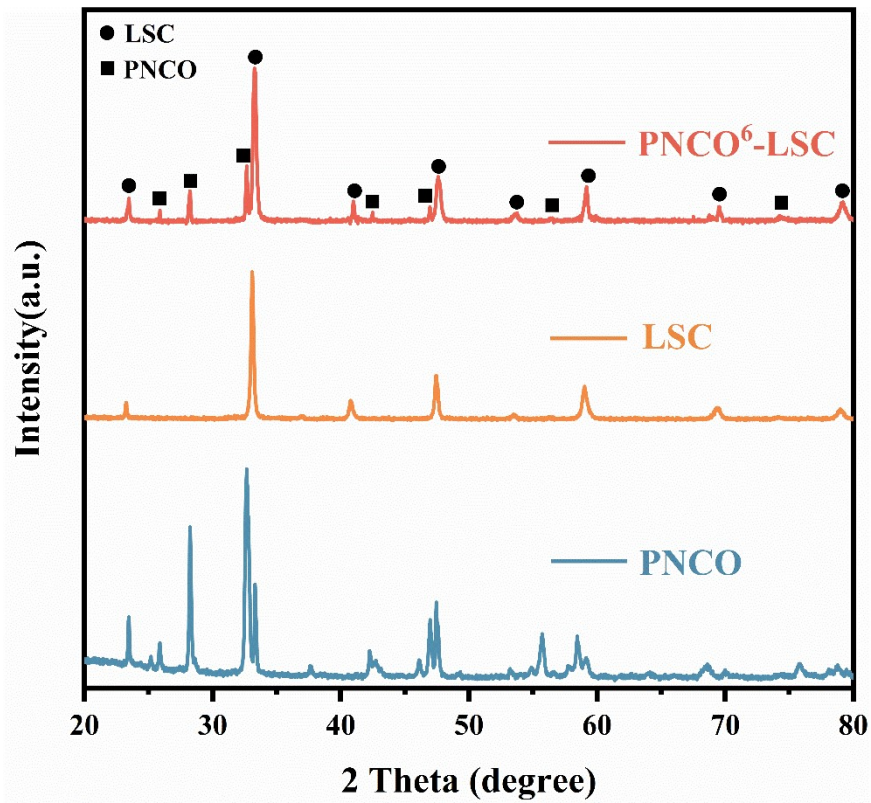

Fig S1. XRD patterns of LSC, PNCO and PNCO<sup>6</sup>-LSC.

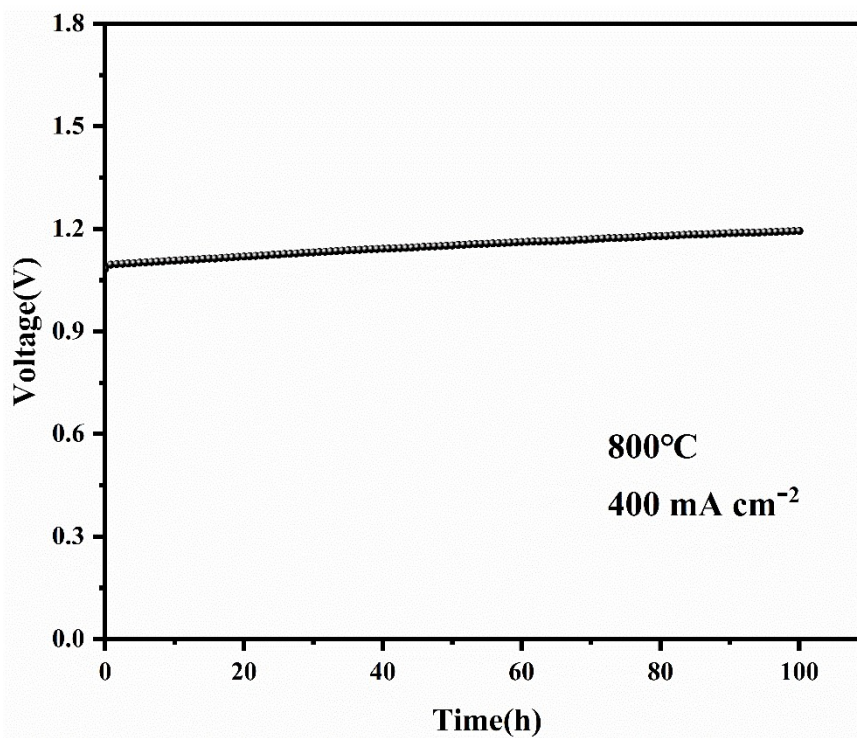

Fig S2. Long-term stability of LSC oxygen electrode cells.
